# Supplementary material for: Evaluation of MITgcm-based ocean reanalysis for the Southern Ocean
Source: Copernicus journal article supplement (doi:10.5194/egusphere-2024-727), 2024-04-17
Supplement: Supplementary file 1 [file egusphere-2024-727-supplement.pdf]

1 Supplementary Information

2

3 Evaluation of MITgcm-based ocean reanalysis for the Southern Ocean

4

5 Nakayama et al.

6

7

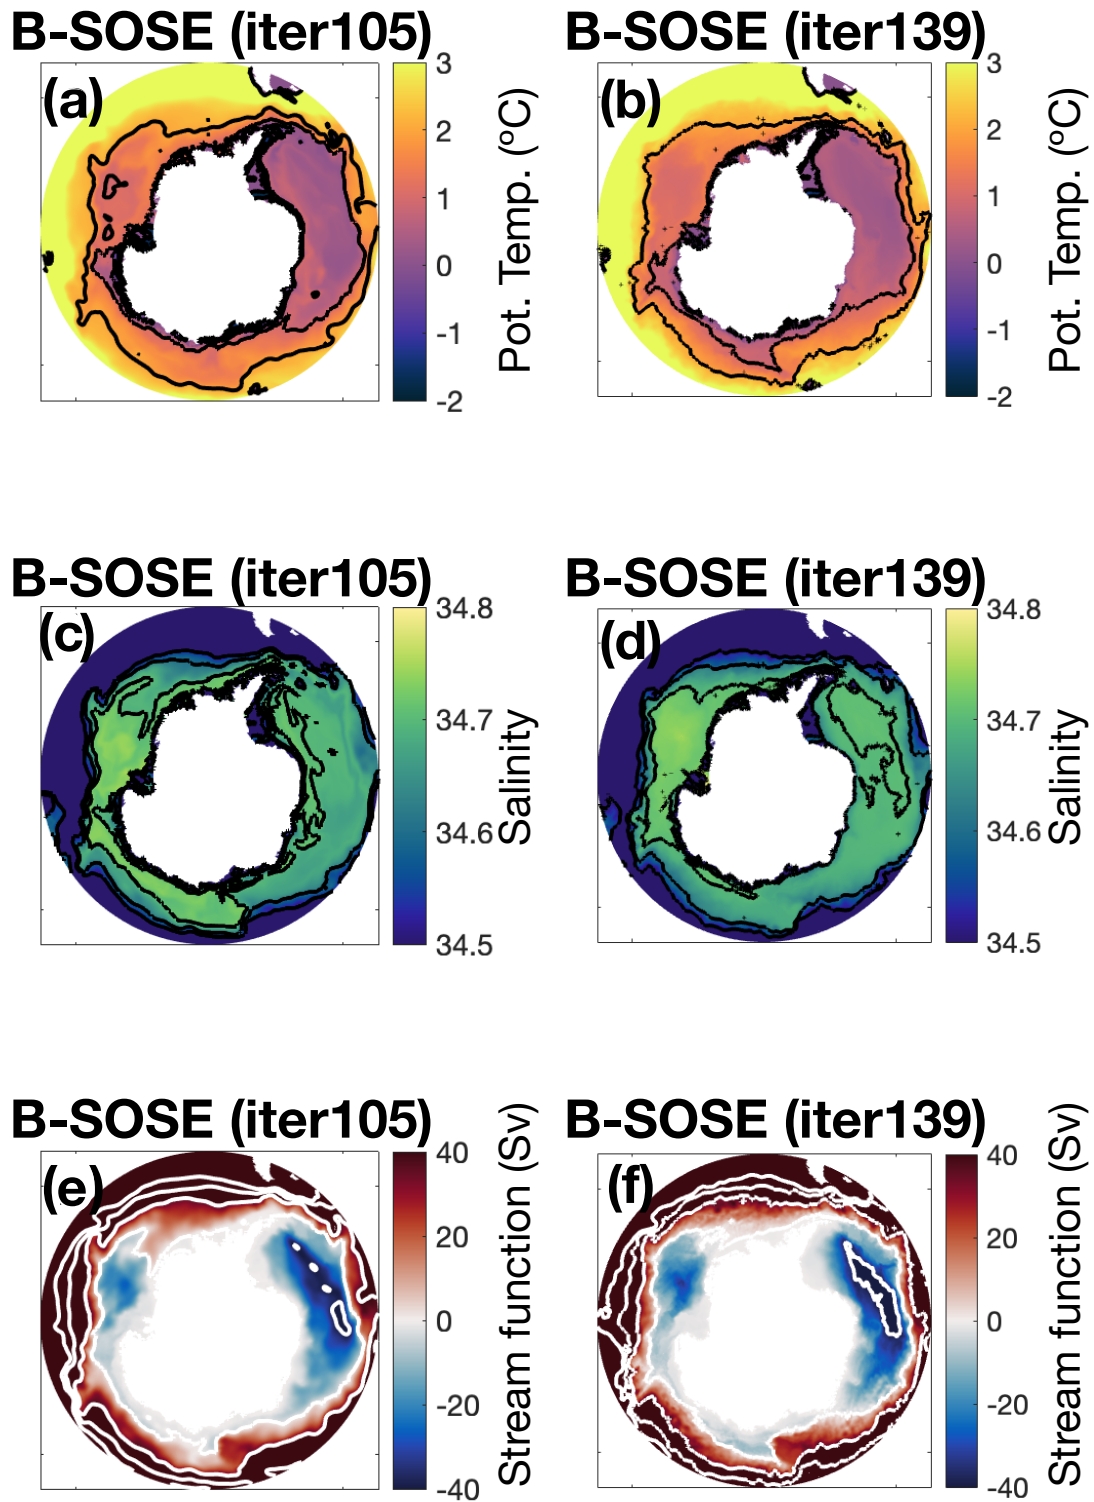

8

9 **Supplementary Figure 1.** Same as Fig. 4 but for SOSE iterations 105 and 139.

10

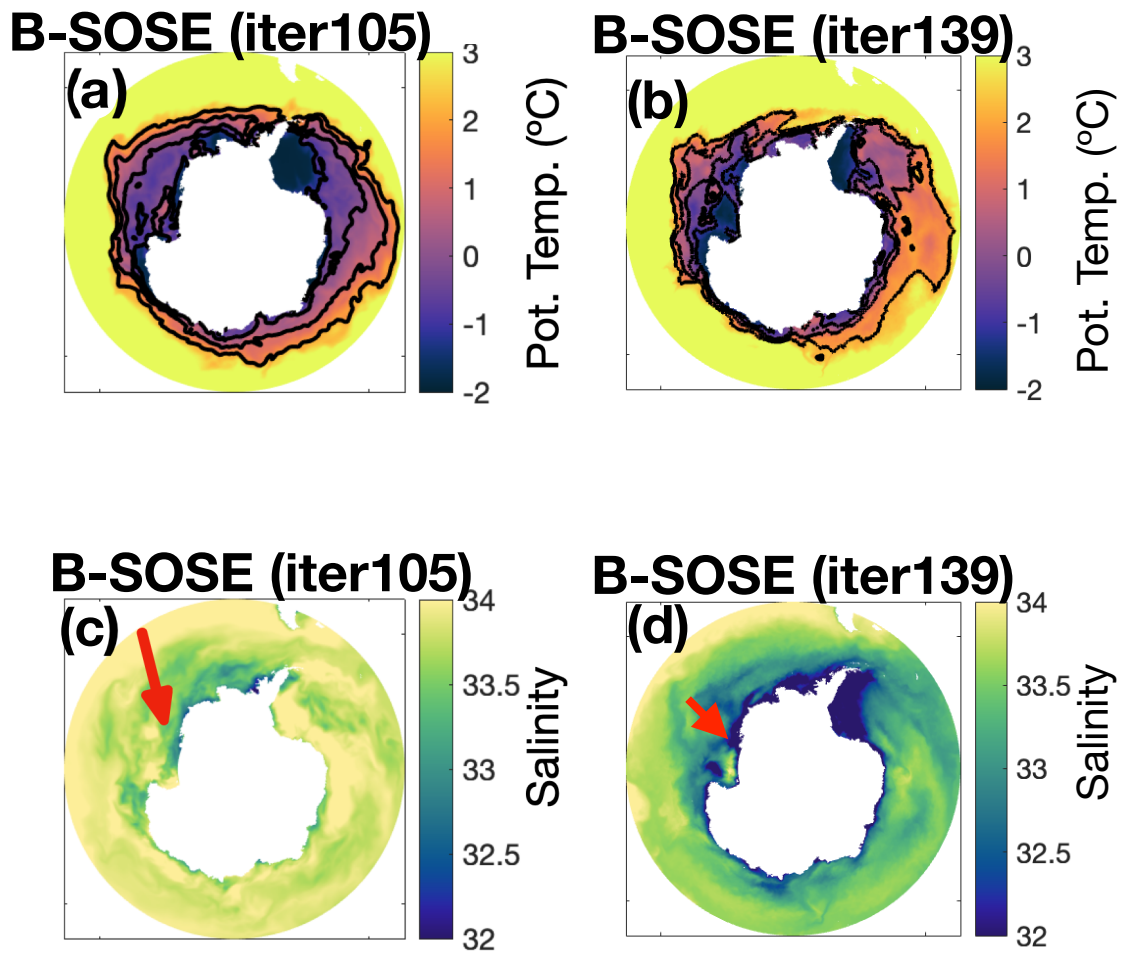

11

12 **Supplementary Figure 2.** Same as Fig. 5 but for SOSE iterations 105 and 139.

13

14

15

16

17

18

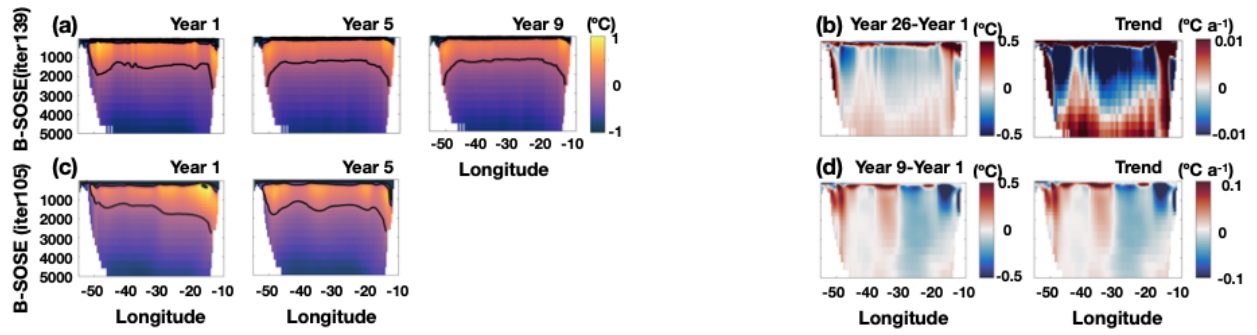

19

20 **Supplementary Figure 3.** Same as Fig. 9 but for SOSE iterations 105 and 139. Note that color

21 scale for SOSE trends are different compared to other figures in Fig. 9.

22

23

24

25

26

27

28

29

30

31

32

33

34

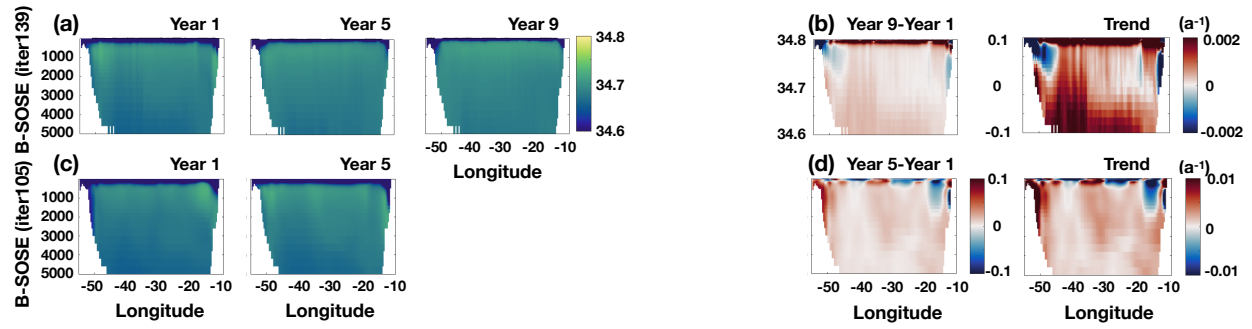

35

36 **Supplementary Figure 4.** Same as Fig. 10 but for SOSE iterations 105 and 139. Note that the

37 color scale for SOSE trends is different compared to other figures in Fig. 10.

38

39

40

41

42

43

44

45

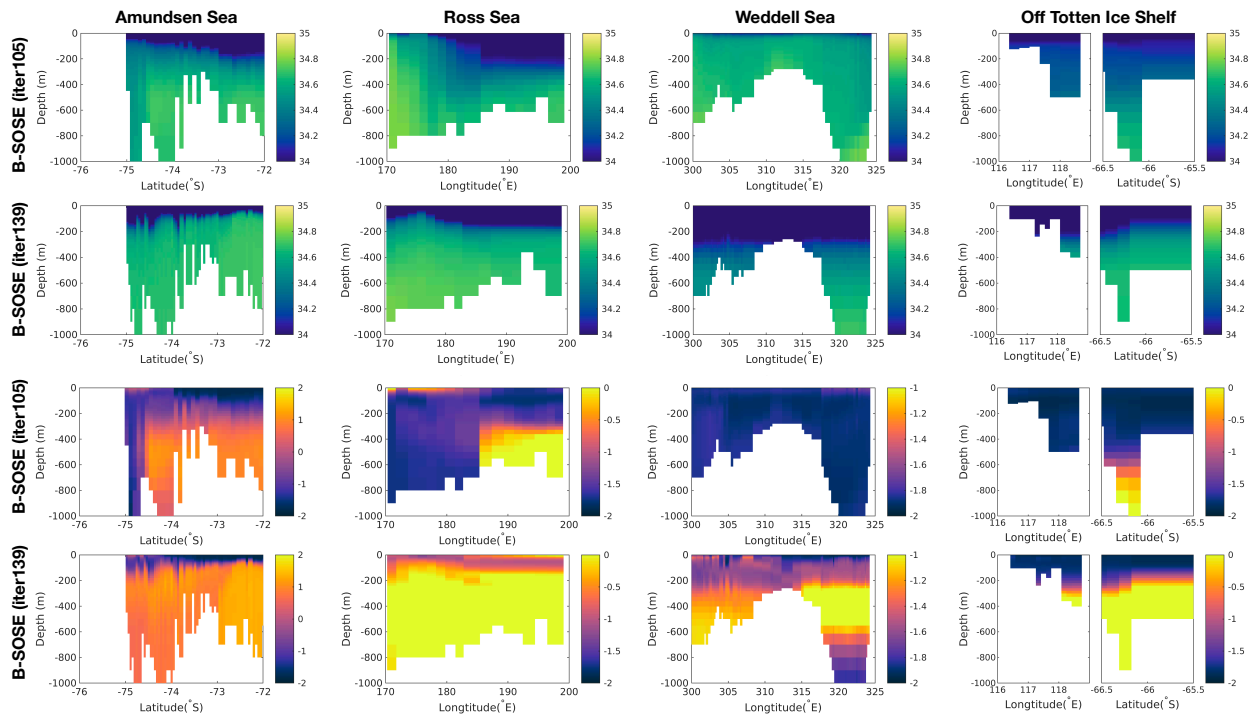

46

47 **Supplementary Figure 5.** Comparisons between SOSE iterations 105 and 139 for all

48 temperature and salinity sections shown in Figures 15 and 16.
